# Supplementary material
Source: publisher figshare collection journal article supplement (https://acs.figshare.com/ndownloader/files/22097643)
Supplement: Supplementary file 1 [file 22097643]

# Electrophilic Azides for Materials Synthesis and Chemical Biology

*Sheng Xie,<sup>1\*</sup> Madanodaya Sundhoro,<sup>2</sup> K. N. Houk,<sup>3\*</sup> Mingdi Yan<sup>2\*</sup>*

<sup>1</sup>State Key Laboratory of Chemo/Biosensing and Chemometrics, College of Chemistry and Chemical Engineering, Hunan University, Changsha 410082, P. R. China

<sup>2</sup>Department of Chemistry, University of Massachusetts Lowell, 1 University Ave., Lowell, MA 01854, USA

<sup>3</sup>Department of Chemistry and Biochemistry, University of California, Los Angeles, CA 90095

## Table of Contents

|                                                                                                                                                      |    |
|------------------------------------------------------------------------------------------------------------------------------------------------------|----|
| 1. Cycloaddition reaction of sulfonyl azide and phenylacetaldehyde enamine.....                                                                      | S1 |
| 2. Synthesis of 4-methyl- <i>N</i> -(morpholinomethylene)benzenesulfonamide.....                                                                     | S1 |
| 3. <b>Figure S1.</b> <sup>1</sup> H NMR spectrum of 4-methyl- <i>N</i> -(morpholinomethylene)benzenesulfonamide in DMSO- <i>d</i> <sub>6</sub> ..... | S2 |
| 4. <b>Figure S2.</b> <sup>13</sup> C NMR spectrum of 4-methyl- <i>N</i> -(morpholinomethylene)benzenesulfonamide in CDCl <sub>3</sub> .....          | S3 |
| 5. References.....                                                                                                                                   | S4 |

## 1. Cycloaddition reaction of sulfonyl azide and phenylacetaldehyde enamine

We carried out the cycloaddition reaction of sulfonyl azide with phenylacetaldehyde enamine under similar conditions ( $\text{CDCl}_3$ , room temperature) as in our earlier published paper for PFAAs.<sup>1</sup> The amidine product was isolated in 20-40% yields, accompanied by unanalyzable byproducts. Similar transformation was also reported in the literature.<sup>2</sup>

Below is a specific reaction between tosyl azide and styrylmorpholine (**Scheme S1**), together with the experimental details and NMR spectra (**Figs. S1, S2**) of the product.

## 2. Synthesis of 4-methyl-*N*-(morpholinomethylene)benzenesulfonamide

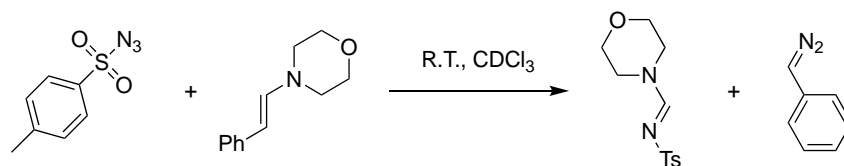

**Scheme S1.** Reaction of tosyl azide with styrylmorpholine.

To a solution of (*E*)-4-styrylmorpholine (1.0 mmol) in  $\text{CDCl}_3$  (1.0 mL), a solution of tosyl azide (1.1 mmol) in  $\text{CDCl}_3$  (1.0 mL) was added dropwise while stirring at room temperature. The reaction progress was monitored by NMR spectroscopy. After the completion of the reaction (~24 h), the solvent was removed under reduced pressure. The crude product was purified by flash column chromatography (EtOAc/hexanes = 1:9) to give the amidine product ( $R_f = 0.2$ ) as a white powder (yield: 30%).  $^1\text{H}$  NMR (500 MHz,  $\text{DMSO}-d_6$ ):  $\delta_{\text{H}}$  2.36 (s, 3H, Ar- $\text{CH}_3$ ), 3.58 (m, 8H, morpholine H), 7.34 (d, 2H, Ar-H,  $J_{\text{HH}} = 8.1$  Hz), 7.65 (dm, 1H, Ar-H,  $J_{\text{HH}} = 8.2$  Hz), 8.29 (s, 1H, NC-H);  $^{13}\text{C}$  NMR (125 MHz,  $\text{CDCl}_3$ ):  $\delta$  21.64, 44.31, 50.41, 66.04, 66.92, 126.69, 129.51, 139.21, 142.83, 157.69.

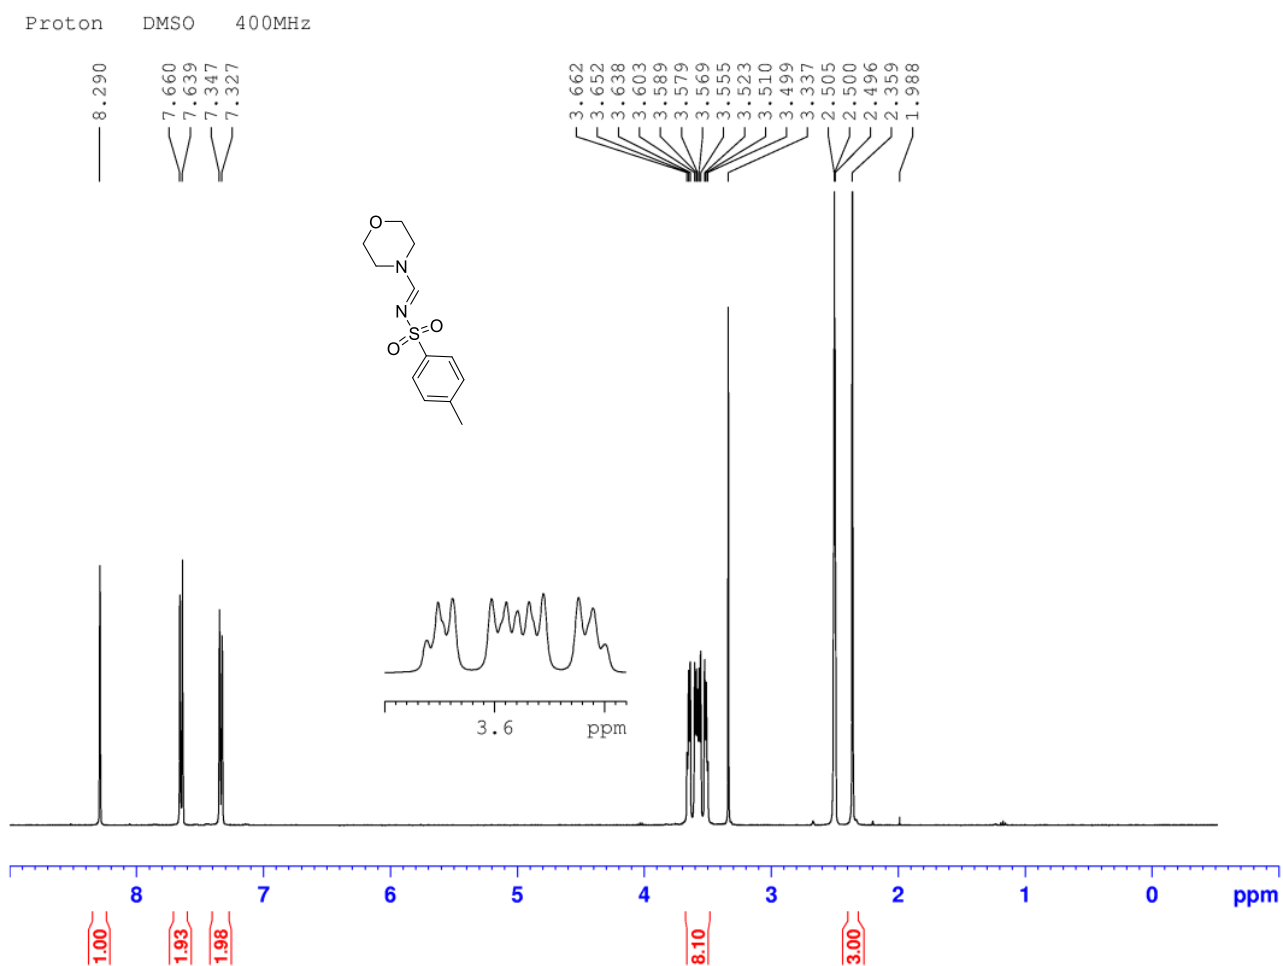

**Figure S1.**  $^1\text{H}$  NMR spectrum of 4-methyl-*N*-(morpholinomethylene)benzenesulfonamide in  $\text{DMSO-}d_6$ .

C13 CDCl3 100MHz

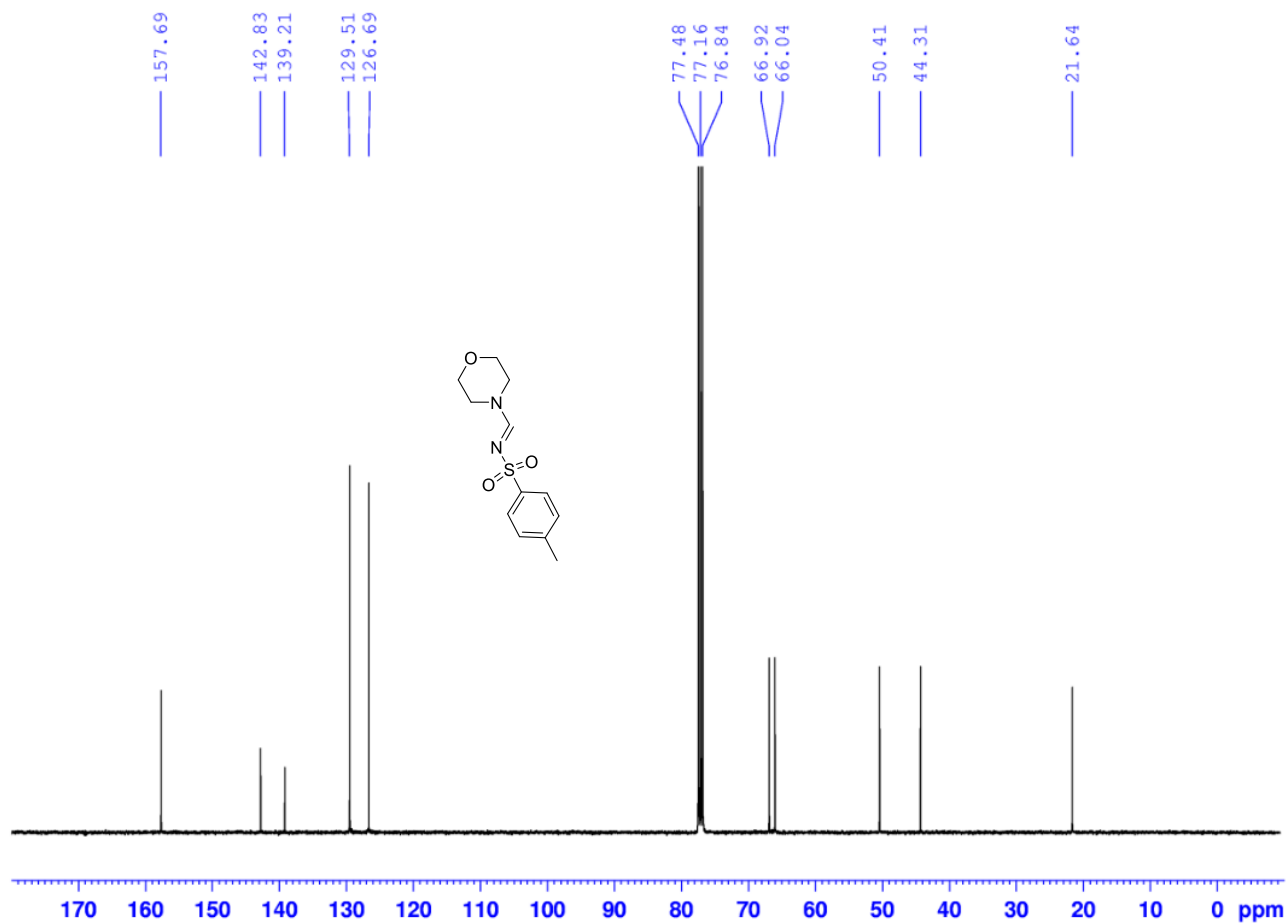

**Figure S2.**  $^{13}\text{C}$  NMR spectrum of 4-methyl-*N*-(morpholinomethylene)benzenesulfonamide in  $\text{CDCl}_3$ .

## References

1. Xie, S.; Lopez, S. A.; Ramstrom, O.; Yan, M.; Houk, K. N. 1,3-Dipolar cycloaddition reactivities of perfluorinated aryl azides with enamines and strained dipolarophiles. *J. Am. Chem. Soc.* **2015**, *137*, 2958-2966.
2. Efimov, I.; Bakulev, V.; Beliaev, N.; Beryozkina, T.; Knippschild, U.; Leban, J.; Zhi-Jin, F.; Eltsov, O.; Slepukhin, P.; Ezhikova, M.; Dehaen, W. Reactions of  $\beta$ -Azolylenamines with Sulfonyl Azides as an Approach to *N*-Unsubstituted 1,2,3-Triazoles and Ethene-1,2-diamines. *Eur. J. Org. Chem.* **2014**, 3684-3689.
